# Supplementary material for: A unique uracil-DNA binding protein of the uracil DNA glycosylase superfamily
Source: PubMed Central journal article supplement — Nucleic Acids Res. 2015 Aug 24;43(17):8452–63. doi: 10.1093/nar/gkv854 (PMC4787834; doi:10.1093/nar/gkv854), 2015-08-24

*Supplementary Materials and Methods and Figures*

**A unique uracil-DNA binding protein of the uracil DNA glycosylase superfamily**

Pau Biak Sang<sup>1</sup>, Thiruneelakantan Srinath<sup>1</sup>, Aravind Goud Patil<sup>1</sup>, Eui-Jeon Woo<sup>2</sup> and Umesh Varshney<sup>1,3\*</sup>

<sup>1</sup>Department of Microbiology and Cell Biology, Indian Institute of Science, Bangalore, 560012, India, <sup>2</sup>Functional Genomic Research Center, Korea Research Institute of Bioscience and Biotechnology, 125 Gwahakro, Yuseongu, Daejeon, S. Korea and <sup>3</sup>Jawaharlal Nehru Centre for Advanced Scientific Research, Bangalore, 560064, India

\* *Correspondence to:* Umesh Varshney, Phone: +918022932686, Fax: +918023602697, E-mail: varshney@mcbi.iisc.ernet.in; uvarshney@gmail.com

## Supplementary Materials and Methods

### **Cloning of *M. avium* UdgX (*MavUdgX*) and *R. imtechensis* UdgX (*RimUdgX*) and its**

**purification:** The ORFs of *MsmUdgX* homologs from *M. avium* (*MavUdgX*, 666 bp) and *R. imtechensis* (*RimUdgX*, 651 bp) were PCR amplified using *MavUdgX* Fp (5' CCCGCATATGGTAGCTATTACGCGA 3') containing NdeI site and *MavUdgX* Rp (5' GCAGGAATTCTTGCCGCACAAGAA 3') containing EcoRI site for *MavUdgX*; and *RimUdgX* Fp (5' CGACGCATATGTCACGCGCCACGAA 3') containing NdeI site and *RimUdgX* Rp (5' CCAGGAATTCGGCTGGTTGATCACAGG 3') containing EcoRI site for *RimUdgX*. PCR (50  $\mu$ L) consisted 200  $\mu$ M dNTPs, 20 pmol each of *MavUdgX* Fp/*RimUdgX* Fp and *MavUdgX* Rp/*RimUdgX* Rp primers and 1 U of Phusion DNA polymerase (NEB) and 10  $\mu$ L supernatant (out of 50  $\mu$ L) of *M. avium*/*R. imtechensis* single colonies boiled in water. PCR conditions included initial denaturation at 98 °C for 4 min followed by 30 cycles of incubations at 98 °C for 1 min, 63 °C for 30 s and 72 °C for 45 s and then a final extension at 72 °C for 10 min. The PCR products were cloned into pJET1.2 (MBI) vector, digested with NdeI and EcoRI and cloned into similarly digested pET14b vector generating pET14b*MavUdgX* and pET14b*RimUdgX*, the resulting plasmid was confirmed by DNA sequencing (Macrogen, S. Korea). N-terminally His-tagged *MavUdgX* and *RimUdgX* were purified using pET14b*MavUdgX* and pET14b*RimUdgX* constructs, respectively from *E. coli* Rosetta (DE3) strain. The purification protocol is similar to the one used to purify *MsmUdgX*.

### **Assay of *MsmUdgX* using different substrates, under different temperature, pH, *M.***

***smegmatis* cell free extract and Ung protein:** Standard UDG assays were done for *MsmUdgX* as previously mentioned using <sup>32</sup>P-end labelled substrates of different sizes or oligomer containing different base modifications, the reaction mixture was resolved on 15% SDS PAGE or 15% polyacrylamide (19:1) 8 M urea gels, respectively. For assays at different temperatures, *MsmUdgX* along with the reaction buffer without the substrate was kept at the

required temperatures (45 °C to 65 °C) for 10 min and then the substrate was added and incubated further at the same temperature for 20 min. For assays at different pH, UDG assays were done in buffers having different pH (pH of 4.5 to 10). For checking the effect of cell free extract, *MsmUdgX* was mixed with different concentration of *M. smegmatis* cell free extract and the same assay was followed, a reaction having cell free extract alone was also taken as a control. For assays with Ung protein, *MsmUdgX* was allowed to react with the substrate for 10 min, and then Ung was added to the reaction, the reaction was allowed to go further for another 10 min. The order of Ung and *MsmUdgX* was reversed or both were added simultaneously in another reaction.

**Generation of R107S, H109S, SSAS and LD mutations in the KRRIH region of *MsmUdgX*:** To generate *MsmUdgX* R107S, *MsmUdgX* Fp (5' TGCATATGGCGGG TGCGCAAGAT 3'), and *MsmUdgX* RS Rp (5' GTGGATCGATC GTTTGCCTCCCGCT GCCCGCGTG 3') were used to amplify the N-terminal region of *MsmUdgX*; and *MsmUdgX* RS Fp (5' CAAACGATCGATCCACAAGACCCCCAGTCGTACC 3') and *MsmUdgX* Rp (5' CAAGCTTGCAGATGGGCTCCATC 3') to amplify the C-terminal region, using standard Pfu DNA polymerase based PCR with an annealing at 60 °C for 35 s and an extension of 1 min. Both the PCR products were mixed together and used as a template along with *MsmUdgX* Fp and *MsmUdgX* Rp primers for another round of PCR using Pfu DNA polymerase with PCR condition similar to that used for amplification of *MsmUdgX* gene (see main text). The amplicon was eluted and digested with NdeI/HindIII and cloned into similarly digested pET14b vector to generate pET14b*MsmUdgX* R107S. The construct was confirmed by PvuI (site introduced in the mutagenic primer, *MsmUdgX* RS Rp) digestion and DNA sequencing. To generate *MsmUdgX* H109S, *MsmUdgX* Fp and *MsmUdgX* HS Rp (5' GGTCTTGGATATC CGTCGTTTGCCTCCCGCTGC 3' ) having EcoRV site were used to amplify the N-terminal region of *MsmUdgX* and *MsmUdgX* HS Fp (5' CGACGGAT

ATCCAAGACCCCCAGT CGTACCGAG 3') and *MsmUdgX* Rp to amplify the C-terminal region. Both the PCR products were used as a template along with *MsmUdgX* Fp and *MsmUdgX* Rp primers for another round of PCR and cloned into pET14b vector as above for pET14b*MsmUdgX* H109S. The construct was confirmed by EcoRV digestion and DNA sequencing. To generate *MsmUdgX* SSAS, *MsmUdgX* Fp and *MsmUdgX* SSAS Rp (5' CTTGCTAGCGCTGCTTTTGCCTCCCGCTGCCCGCGTGA ACT 3' ) having NheI site were used to amplify the N-terminal region of *MsmUdgX* and *MsmUdgX* HS Fp (5' AAGCAGCGCTAGCAAGACCC CCAGTCGTACCGAGGTGGTG 3') and *MsmUdgX* Rp to amplify the C-terminal region. Both the PCR products were used as a template along with *MsmUdgX* Fp and *MsmUdgX* Rp primers for another round of PCR and cloned into pET14b vector as done above to generate pET14b *MsmUdgX* SSAS. The plasmid was confirmed by NheI digestion and DNA sequencing. To generate *MsmUdgX* LD (loop deleted), *MsmUdgX* Fp and *MsmUdgX* LD2 Rp (5' TGCAGGCCGCCGAACAATCGTACCCCCAGTCGTACC GAGGTG 3') were used to amplify the N-terminal region of *MsmUdgX* and *MsmUdgX* HS Fp (5' ACGATTGTTGCGCGGCCTGCACTTGACCGCGTTGGTGACGTA 3') and *MsmUdgX* Rp to amplify the C-terminal region. Both the PCR products were used as a template along with *MsmUdgX* Fp and *MsmUdgX* Rp primers for another round of PCR and cloned into pET14b vector as done above to generate pET14b*MsmUdgX* LD. The plasmid was confirmed by DNA sequencing.

**Generation of F4, F1 and F4LD mutations in motif A along with the KRRIH region of *MsmUdgX*:** To generate *MsmUdgX* Q53A (F4) mutant, the primers set *MsmUdgX* QA Fp 5' GATGATCGGCGAGGCGCCCGGTGACAAAG 3' and *MsmUdgX* QA Rp 5' CTTTGTCACCGGGCGCCTCGCCGATCATC 3' were used. PCR amplification of left (150 bp) and right (512 bp) regions of the mutant amino acid was done using Pfu DNA polymerase with primers *MsmUdgX* Fp/*MsmUdgX* QA Rp and *MsmUdgX* QA Fp/*MsmUdgX* Rp respectively,

PCR conditions were, initial denaturation at 94 °C for 4 mins and 29 cycles of 94 °C for 1 min, 55 °C for 30 s, 70 °C for 30 s and 1 min both for the left and right regions, followed by final extension for 10 min. Both the PCR products were eluted and mixed together along with *MsmUdgX* Fp and *MsmUdgX* Rp for another round of PCR amplification. The PCR product was again eluted and cloned into pJET1.2 vector, the *MsmUdgX* QA was then mobilized into pET14b vector to get the final expression vector pET14b *MsmUdgX* Q53A which was confirmed by restriction digestion and DNA sequencing. To generate *MsmUdgX* F1 (GQDPY), the primer set *MsmUdgX* GQDPY Fp (5' ATCATGATGATCGGCCAGGATCCCTATGACAAAGAGGACCTG 3') and *MsmUdgX* GQDPY Rp (5' CAGGTCCTCTTTGTCATAGGGATCCTGGCCGATCATCATGAT 3') was used to inverse PCR amplify the plasmid pET14b*MsmUdgX* using Pfu DNA polymerase with primers *MsmUdgX* GQDPY Fp and *MsmUdgX* GQDPY Rp. PCR conditions were, initial denaturation at 94 °C for 4 min and 24 cycles of 94 °C for 1 min, 55 °C for 30 s, 70 °C for 11 min, followed by final extension of 10 min. The PCR product was digested with DpnI restriction enzymes overnight and transformed into competent *E. coli* TG1. Plasmids were prepared from the transformants and confirmed by restriction digestion. The resultant plasmid pET14b*MsmUdgX* F1 was further confirmed by DNA sequencing. To generate *MsmUdgX* F4 (Q53A) LD, primer used are those used for generating *MsmUdgX* LD mutants but the template used was pET14b*MsmUdgX* F4.

**Generation of H109Q, H109G and H109A, and C27S mutations:** To mutate the H109 to other amino acids, a primer *MsmUdgX* NNN Fp (5' CGACGCATCNNNAAGACCCCCAGTCGTACCGAG 3') which has any combination of nucleotides i. e., NNN for the histidine codon and *MsmUdgX* NNN Rp (5' GGTCTTNNGATGCGTCGTTTGCCTCCCGCTGC 3') were taken at a concentration of 30 pmoles for PCR amplification of pET14bUdgX H109S, PCR conditions include, initial denaturation at 94 °C for 4 min, and 18 cycles of 94

°C for 1 min, 60.4 °C for 35 s, 70 °C for 11 min and final extension at 70 °C for 20 min using 1U of Pfu DNA polymerase. The PCR product was digested with DpnI overnight and transformed into *E. coli* TG1 competent cells. Plasmid (i.e., pET14b *MsmUdgX* NNN) was prepared from the transformants and screened by digestion with EcoRV/HindIII digestion. Positive clones were further confirmed by DNA sequencing. The method allowed us to obtain pET14b*MsmUdgX* H109Q, H109G and H109A mutants. To generate C27S mutant, primer set *MsmUdgX* CS Fp (5' GCAGGCGAAAGCCGAGG CTGCGGGTTGTATCGC 3') and *MsmUdgX* CS Rp (5' ATACAACCCGCTGCCTCGG CAT TCGCCTGCCGC 3') were used. The protocol followed was the same as mentioned above.

**Expression analysis of *MsmUdgX* in *M. smegmatis*:** Expression of *MsmUdgX* was analysed by immunoblotting using anti-UdgX antibodies raised in rabbit. Cell free extract of *M. smegmatis* WT, and *M. smegmatis* expressing *MsmUdgX* in a multicopy plasmid was prepared and 30 µg of the extract are resolved on 15% SDS-PAGE. The protein were transferred to a polyvinylidene difluoride (PVDF) membrane (Hybond-P, GE Healthcare) using transfer buffer [25 mM Tris-HCl (pH 8.8), 200 mM glycine, and 0.1% (w/v) SDS containing 15% (v/v) methanol] in a semidry transfer apparatus (Bio-Rad) for 20 min at 25 V. The membrane was treated with blocking solution containing 5% (w/v) skimmed milk powder in Tris-buffered saline–Tween [TBS-T; 20 mM Tris-HCl (pH 8), 150 mM NaCl, and 0.2% (v/v) Tween 20] for 2 h. Washed thrice with TBS-T buffer for 10 min each. Diluted (1:2000) anti-*MsmUdgX* antibody was added and the membrane allowed to rock for another 2 h. The membrane was then washed again thrice with TBS-T buffer for 10 min each followed by addition of 1:2000 diluted anti-IgG conjugated with alkaline phosphatase, rocked for 2 h and then washed again as before. The membrane was then equilibrated with 100 mM Tris-HCl (pH 9), and 100 µL each of 5-bromo-4-chloro-3'-indolyphosphate (BCIP, 5 mg/mL)

and nitro-blue tetrazolium chloride (NBT, 30 mg/mL) were then added along with 40  $\mu$ L of 2 M  $MgCl_2$  and allowed to rock until colour developed.

**Mass spectrometric analysis of *MsmUdgX* and its complex with TTUTT oligomer:**

*MsmUdgX* (~5  $\mu$ g, ~200 pmol) was allowed to bind 1 nmol of TTUTT oligomer in UDG buffer [50 mM Tris-HCl (pH 8.0), 1 mM  $Na_2EDTA$ , 1 mM DTT, 25  $\mu$ g  $mL^{-1}$  of BSA] for 20 min at 37  $^{\circ}C$ . The reaction was then mixed with SDS loading dye; heated at 90  $^{\circ}C$  for 10 min and run on 12% SDS-PAGE, same amount of unbound protein was also loaded. Both the *MsmUdgX* and *MsmUdgX* bound with TTUTT (shifted band) were cut out, minced into 1  $mm^3$  pieces and transferred into a sterile microcentrifuge tube. The gel was washed with 500  $\mu$ L of wash solution (50% acetonitrile, 50 mM ammonium bicarbonate) and incubated at room temperature for 15 min with gentle agitation (vortex mixer on lowest setting), the solution was removed and the washings were repeated twice more until the gel got decolourised. The gel was dehydrated with 100% acetonitrile for 5 min. Acetonitrile was removed and the gel was completely dried at room temperature for 10-20 min in a centrifugal evaporator. The gel piece was then rehydrated in 150  $\mu$ L reduction solution (10 mM DTT, 100 mM ammonium bicarbonate) for 30 min at 56  $^{\circ}C$ . Reduction solution was removed with a pipette, 100  $\mu$ L of alkylation solution (50 mM iodoacetamide, 100 mM ammonium bicarbonate) was added and incubated for 30 min in the dark at room temperature. The alkylation solution was removed with a pipette, 500  $\mu$ L of wash solution was added and incubated at room temperature for 15 min with gentle agitation. The wash solution was discarded and the gel was dehydrated in 100  $\mu$ L 100% acetonitrile for 5 min. The acetonitrile was discarded and the gel was completely dried at room temperature in a centrifugal evaporator. The gel was then rehydrated with a minimal volume of protease digestion solution (trypsin, 20 ng  $\mu$ L $^{-1}$ ) and kept overnight at 37  $^{\circ}C$ . The sample was spun down briefly by centrifugation and the supernatant (containing tryptic peptides) was transferred to sterile

centrifuge tube. A volume of 25-50  $\mu\text{L}$  of extraction solution (60% acetonitrile, 0.1% TFA) was added to the gel pieces and agitated gently by vortexing at lowest setting. The sample was spun down by brief centrifugation. The supernatant was (containing additional tryptic peptides) was transferred to the previous tube. This was repeated one more time and the pooled extracted peptides were dried by centrifugal evaporation to near dryness. An aliquot (5  $\mu\text{L}$ ) of resuspension solution (50% acetonitrile, 0.1% TFA) was added to each tube and gently agitated on a vortex at lowest setting. The sample was spun down and 0.5  $\mu\text{L}$  was mixed with 0.5  $\mu\text{L}$  of  $\alpha$ -cyano-4-hydroxycinnamic acid matrix (10 mg/mL in 50% acetonitrile, 0.1% TFA) and spotted on MALDI plate.

**Cloning of *MsmUdgX* in pMV261 (Hyg<sup>R</sup>) vector with *hsp60* promoter and its native promoter:** *MsmUdgX* ORF was PCR amplified using *MsmUdgX* Fp (BamHI) (5' CTGGAT CCGGCGGGTGC GCAAGAT 3') and *MsmUdgX* Rp (5' CAAGCTTGCAG ATGGGCTCCATC 3') using Pfu DNA polymerase with initial denaturation at 94 °C for 4 min followed by 30 cycles of 94 °C for 1 min, 60 °C for 30 s, and 70 °C for 1 min. The PCR product was cloned into pJET1.2 vector, release by digestion with BamHI/HindIII and subcloned into similarly digested pMV261 (hyg<sup>R</sup>) vector, thus generating a plasmid in which *MsmUdgX* is driven by *hsp60* promoter present in pMV261 plasmid. The resulting plasmid was confirmed by restriction digestion and sequencing.

For cloning *MsmUdgX* with its native promoter, primers *MsmUdgX* 350up Fp (5' CGCAGTCTAGAAATTGGACGGACCGG 3') containing XbaI site which anneals at ~350 bp upstream of the start codon and *MsmUdgX* 100dn Rp (5' GCCGCTGCAGCGACT CAACGAAGC 3') containing PstI site which anneals ~100 bp downstream of the stop codon were used. Amplification was done using Pfu DNA polymerase based PCR with an initial denaturation at 94 oC for 4 min, and 30 rounds of denaturation at 94 oC for 1 min, annealing at a gradient of 62 oC for 35 s and an extension at 70 oC for 2 min 30 s followed by final



extension for 10 min. The PCR product was eluted and digested with XbaI/PstI and ligated to similarly digested pMV261 (hygR) generating pMVUdgX350, thus replacing the hsp60 promoter present in the plasmid. The resulting plasmid was confirmed by restriction digestion and sequencing.

**Generation of *recA* knockout in *M. smegmatis*:** The upstream region (left flank “LF”) of *M. smegmatis recA* gene (MSMEG\_2723) was PCR amplified using primers *MsmRecA* LF Fp (5' TGCGGCGGCCGCGCGGATC 3') which contains NotI site and anneals at ~900 bp upstream of the start codon, and *MsmRecA* LF Rp (5' TCGCGAATTCGAGGGCC TTTTCGC 3') which contains EcoRI and anneals ~100 bp downstream of the start codon. Similarly, the downstream region (right flank “RF”) was amplified using *MsmRecA* RF Fp (5' GCTGAATTCGATGACGTCCTCC 3') which contains EcoRI site and anneals ~100 bp upstream of the stop codon and *MsmRecA* RF Rp (5' CGTACTAGTATCGCAGTTG GTGGT 3') which contains SpeI site and anneals ~900 bp downstream of the stop codon. In both the cases, PCR was done in a 25 µL volume containing 1U of Pfu DNA polymerase, 10 pmoles of each primer, 200 µM dNTP, ~200 ng genomic DNA and Pfu reaction buffer. After initial denaturation at 94 °C for 4 min, 30 cycles of reaction were done at 94 °C for 1 min, 60 °C for 35 s, 70 °C for 2 min and final extension at 70 °C for 10 min. The right flank (RF) was cloned into pJET1.2 vector. A positive clone was then digested with NotI/EcoRI (as there is one NotI site in pJET1.2 vector), and used to clone the left flank (LF) amplicon digested with NotI/EcoRI and generate pJETrecA LF-RF. This construct was confirmed by BamHI digestion. Subsequently, kanamycin cassette was released from pUC4k by digestion with EcoRI (as ~1.2 kb fragment), eluted and ligated to EcoRI digested pJETrecA LF-RF generating pJETrecA LF-kan-RF, this was again confirm by HindIII digestion. This *recA* knockout construct was then release by digestion with NotI/SpeI and ligated to similarly digested pPR27 vector. This final construct pPR*MsmrecA::kan* was then electroporated into

*M. smegmatis* electrocompetent cells and plated in LB-Tween agar plate containing kanamycin and incubated at 30 °C. Two transformants were inoculated into LB-Tween containing kanamycin and incubated at 30 °C till early saturation. An aliquot (100 µL) of this culture was then plated onto LB-Tween agar plate containing 10% sucrose and kanamycin, and incubated at 39 °C. The colonies which appeared were then patched on another plate having the same composition and incubated at 39 °C. The same colonies were also patched on LB-Tween agar plate containing gentamycin. The colonies which do not grow on the gentamycin plate were considered positive clones. The putative positive knockout clones are screened for UV sensitivity by exposing to UV light of 50 J/cm<sup>2</sup> and further confirmed by PCR amplification using primers flanking the *recA* gene locus as seen by the presence of 1.4 kb PCR product as compare to 1.1 kb in the wildtype.

**Generation of *MsmUdgX*, Ugi co-expression construct:** To understand the importance of *MsmUdgX*, it was desirable to generate a strain having excess uracil in its genome, so that in such a background overexpression of *MsmUdgX* might result in *MsmUdgX* binding to uracils and the cells defective in repairing the complex will show defective growth. This was done by over expressing Ugi (a proteinaceous inhibitor of Family 1 UDGs) and *MsmUdgX* from the same plasmid construct. For co-expression of these in *E. coli*, we used pTrc99c vector where both the *MsmUdgX* and Ugi were clone under *trc* promoter and for *M. smegmatis* we used pMV261 to clone both the genes under the *hsp60* promoter.

**Detection of uracil in genomic DNA using *MsmUdgX*:** Genomic DNA (gDNA) from *E. coli* wild type and RZ1032 (*ung-*, *dut-*) strains at different concentrations was diluted in 100 µL of TE buffer [10 mM Tris-HCl (pH 8), 1 mM Na<sub>2</sub>EDTA] and blotted onto a positively charged nylon membrane (Hybond-XL, GE Healthcare) using a dotblot apparatus (BioRad). The gDNA was crosslink to the membrane using UV light. The membrane was then kept in a blocking solution i.e., 5% (w/v) skimmed milk powder made in TBS-T [20 mM Tris-HCl (pH

8), 150 mM NaCl and 0.2% Tween 20] buffer for 2 h. Washed thrice with TBS-T buffer for 10 min each. 2  $\mu$ g of *MsmUdgX* protein was then added to the membrane soaked in 10 mL of blocking solution and allowed to rock for 2 h. Washed thrice with TBS-T buffer for 10 min each and then 1:2000 diluted anti-*MsmUdgX* antibody (generated in rabbit) was added and allowed to rock for another 2 h. The membrane was then again washed thrice with TBS-T buffer for 10 min each followed by addition of 1:2000 diluted anti-IgG conjugated with HRP, rock for 2 h and then washed as before. HRP substrate (luminol) and H<sub>2</sub>O<sub>2</sub> were added in 1:1 ratio, and then the chemiluminescence was captured using a ChemiDoc.

Sang et. al. Fig. S1

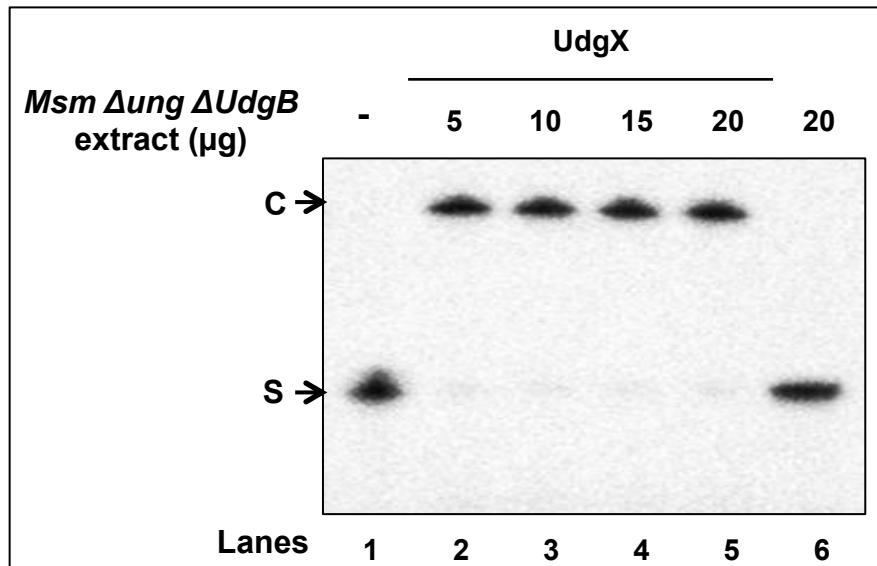

**Figure S1.** *MsmUdgX* activity assay in the presence of *M. smegmatis*  $\Delta$ *ung*  $\Delta$ *udgB* cell free extracts using 5'  $^{32}$ P-labelled SSU9 substrate. ~100 ng of *MsmUdgX* was mixed with the indicated amounts of *M. smegmatis*  $\Delta$ *ung* $\Delta$ *udgB*, cell free extracts, the mixture was used in a standard UDG activity assay. Cell free extract without *MsmUdgX* (lane 6) was taken as a control. Reactions were resolved on 8 M Urea-PAGE (15%) and analyzed by phosphor imaging. The absence of any product band indicated that *MsmUdgX* even in the presence of cellular proteins UdgX did not result in product release.

Sang et. al. Fig. S2

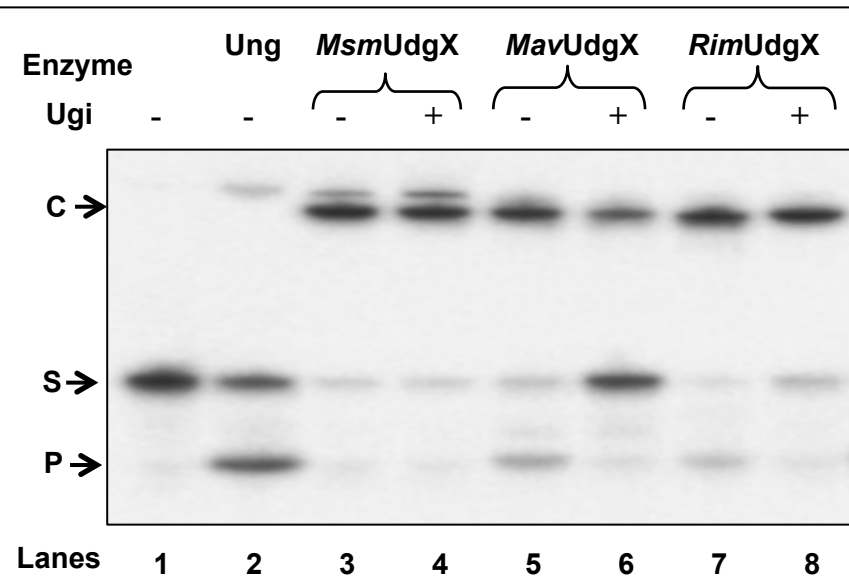

**Figure S2.** Assay with UdgX homologs from *M. avium* and *R. imtechensis* using 5'  $^{32}$ P-labelled SSU9 substrate. *MavUdgX* and *RimUdgX* were partially purified from *E. coli* BL21 (DE3) strain, ~100 ng of each protein were used in a standard UDG activity assay, the assay was done in the presence and absence of Ugi to distinguish from any Ung activity coming for the contaminating *EcoUng*. Reactions were resolved on 8 M Urea-PAGE (15%) and analyzed by phosphor imaging. The formation of complex by *MavUdgX* and *RimUdgX* indicates that this binding activity is a general property of UdgX proteins.

Sang et. al. Fig. S3

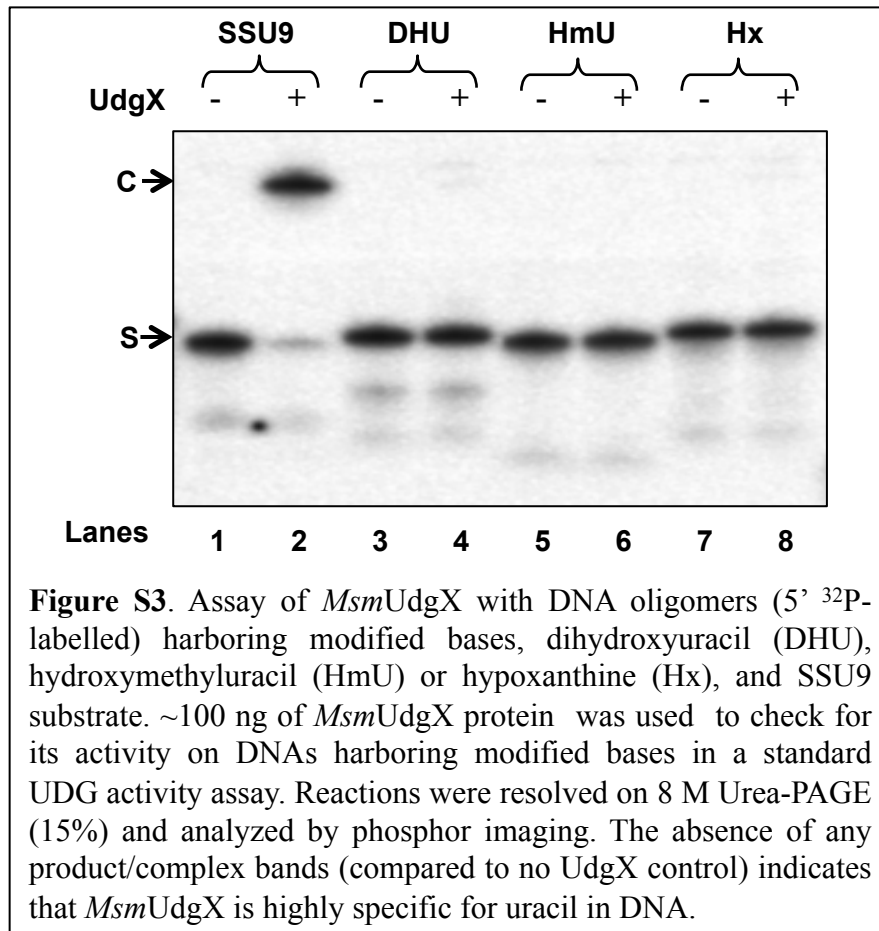

Sang et. al. Fig. S4

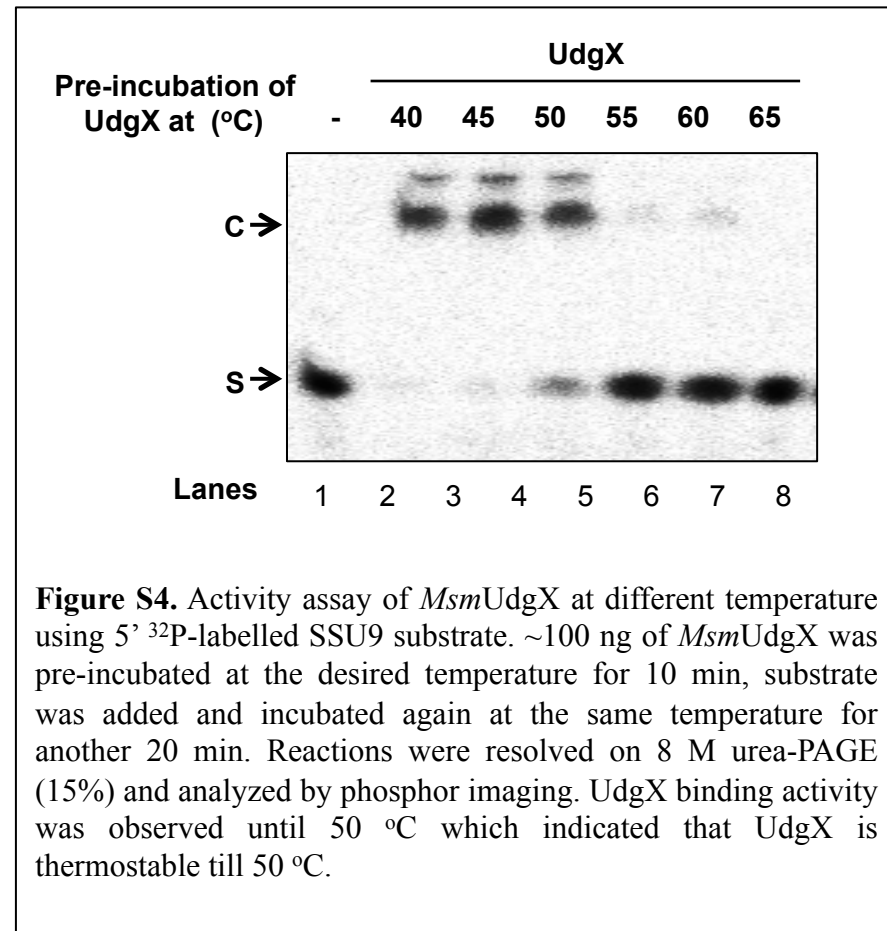

Sang et. al. Fig. S5

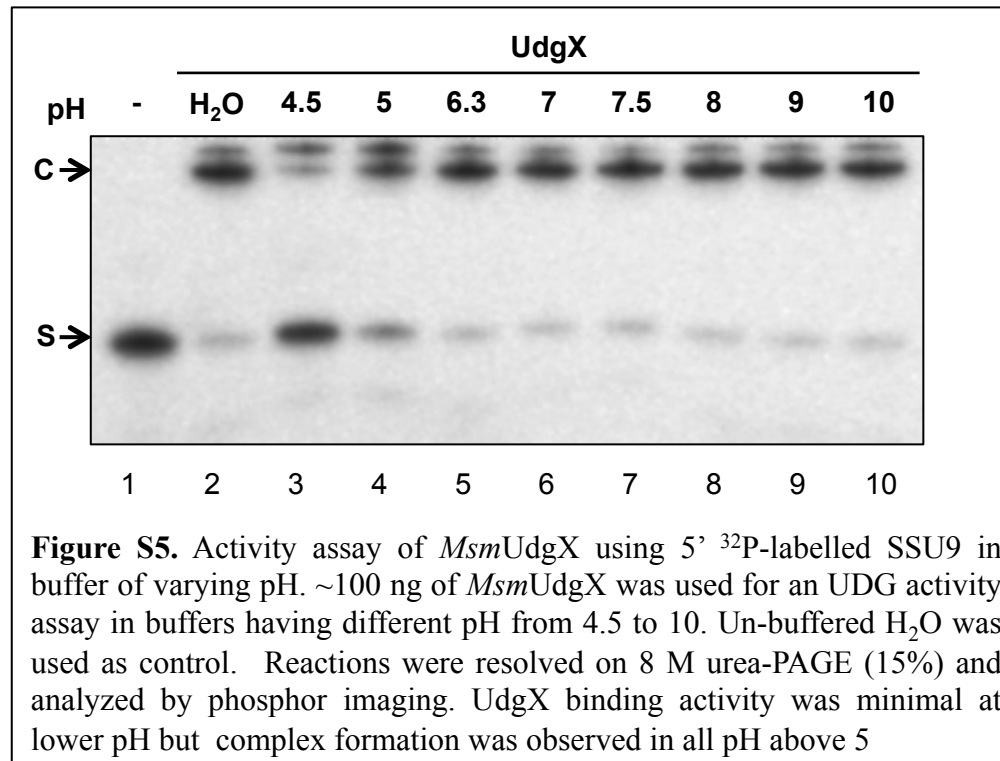

Sang et. al. Fig. S6

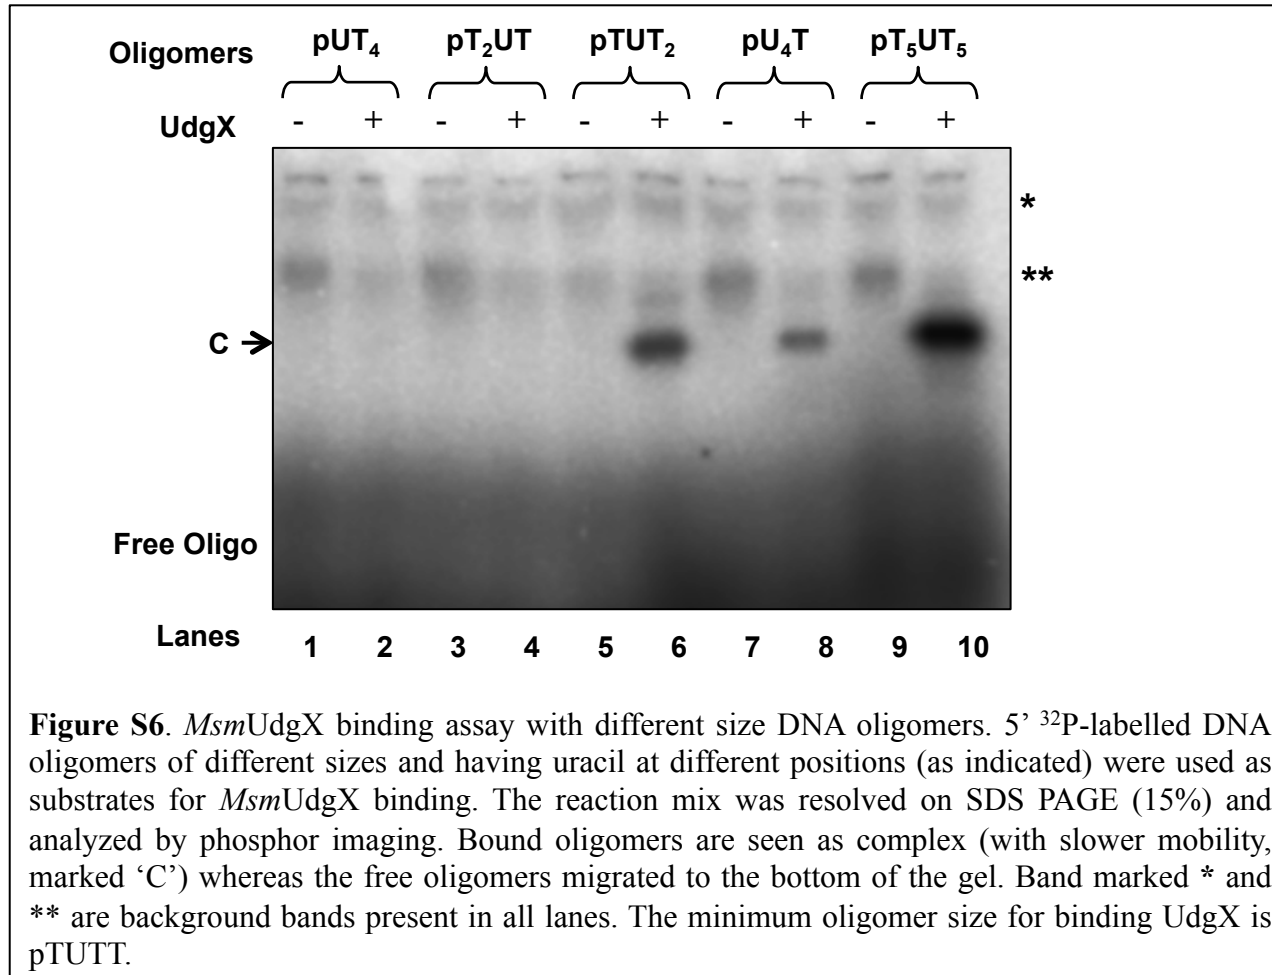

Sang et. al. Fig. S7

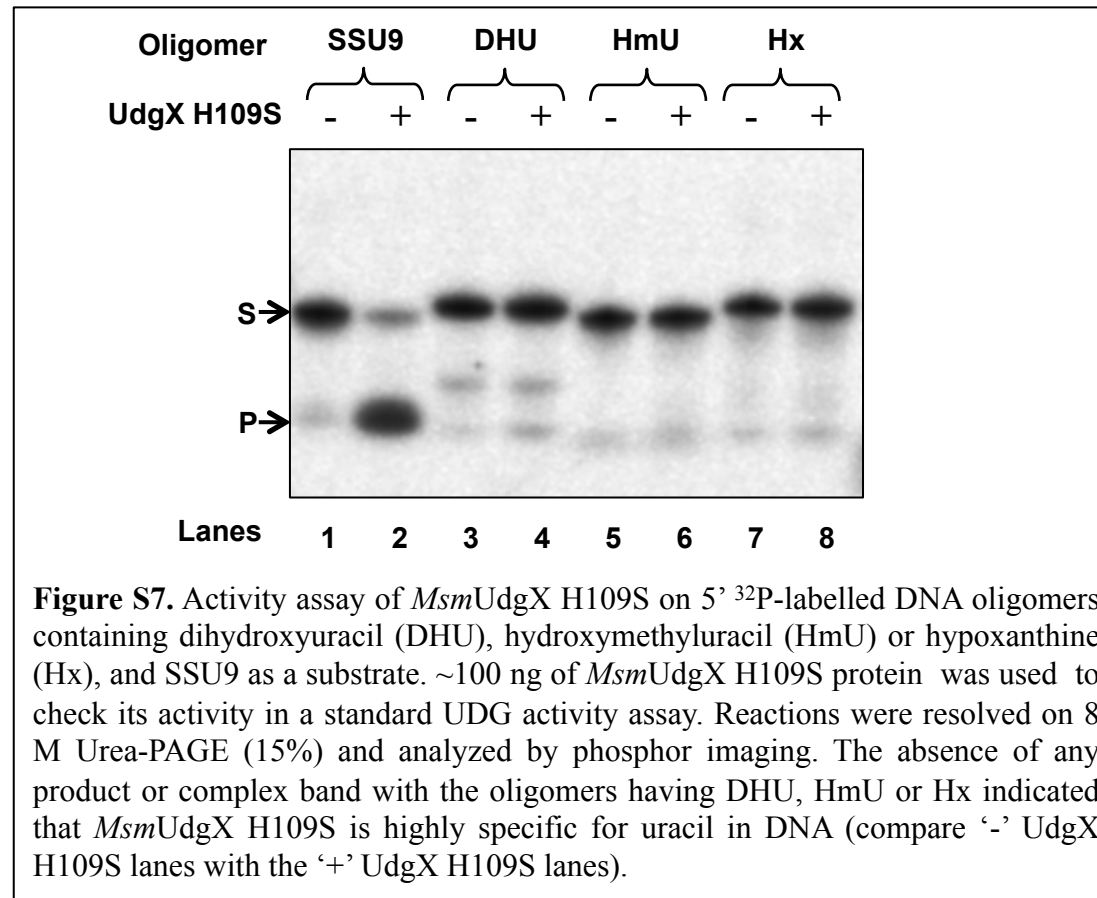



Sang et. al. Fig. S8

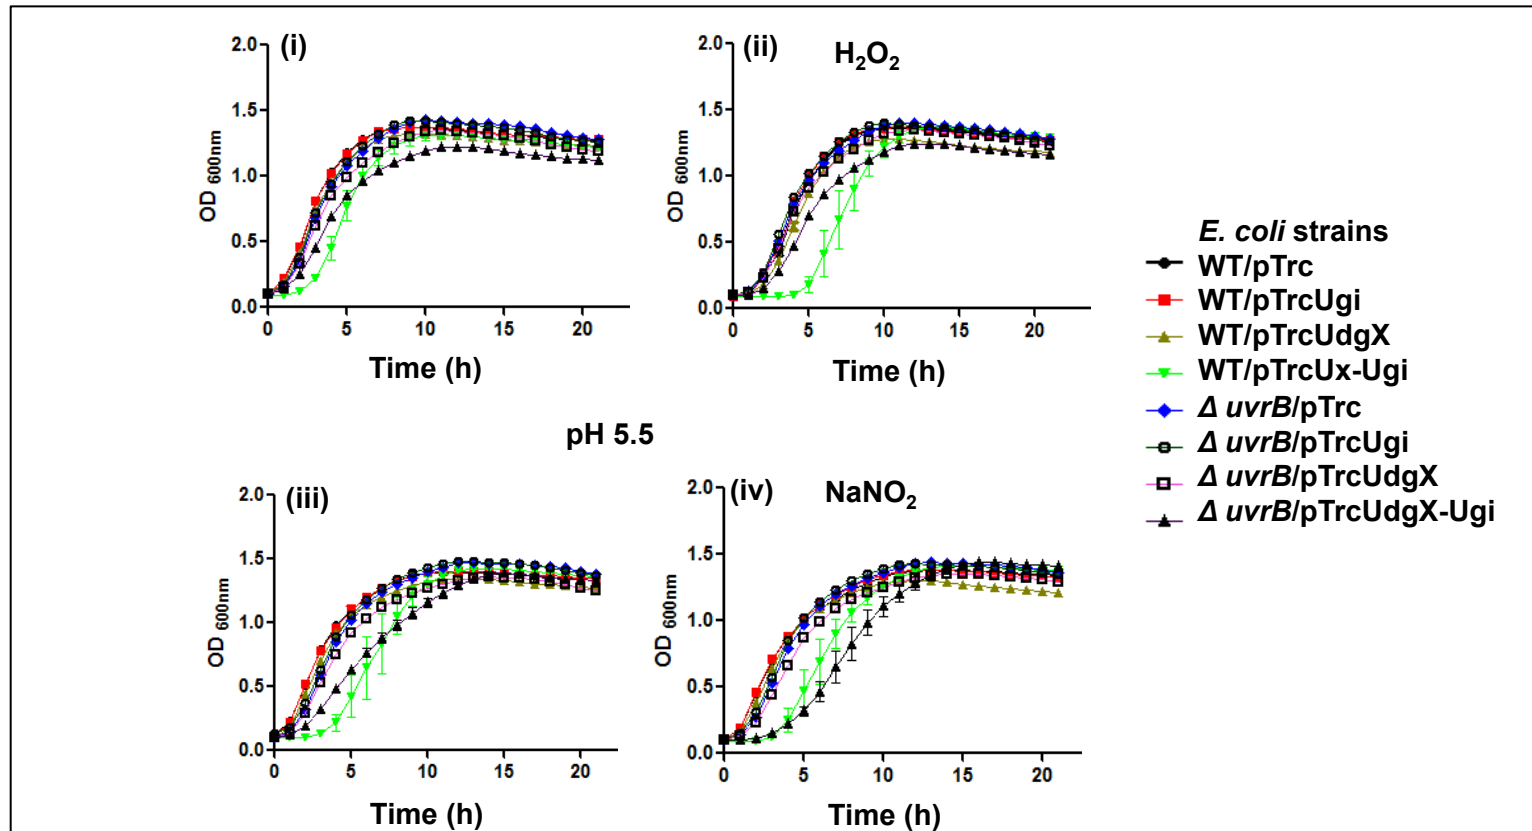

**Figure S8.** Growth curve analysis of *E. coli* WT and its  $\Delta uvrB$  derivative harbouring different plasmids in the absence or presence of H<sub>2</sub>O<sub>2</sub> or NaNO<sub>2</sub>. *E. coli* strains (3 to 5 replicates) were used for growth curve analysis in 100 well microtiter plates. Aliquots (200  $\mu$ L) of 10<sup>-2</sup> dilutions of saturated cultures in LB containing Amp and 0.5 mM IPTG were taken in the absence or presence of 2 mM H<sub>2</sub>O<sub>2</sub> or 1 mM NaNO<sub>2</sub>. For growth in NaNO<sub>2</sub>, the medium was adjusted to a pH of 5.5. Growth was monitored as OD<sub>600</sub> at 37 °C for 24 h using Bioscreen C kinetic growth reader under constant shaking. Growth curves were prepared from the growth of three independent colonies for each strain, and the mean  $\pm$  SD were plotted.

Sang et. al. Fig. 9

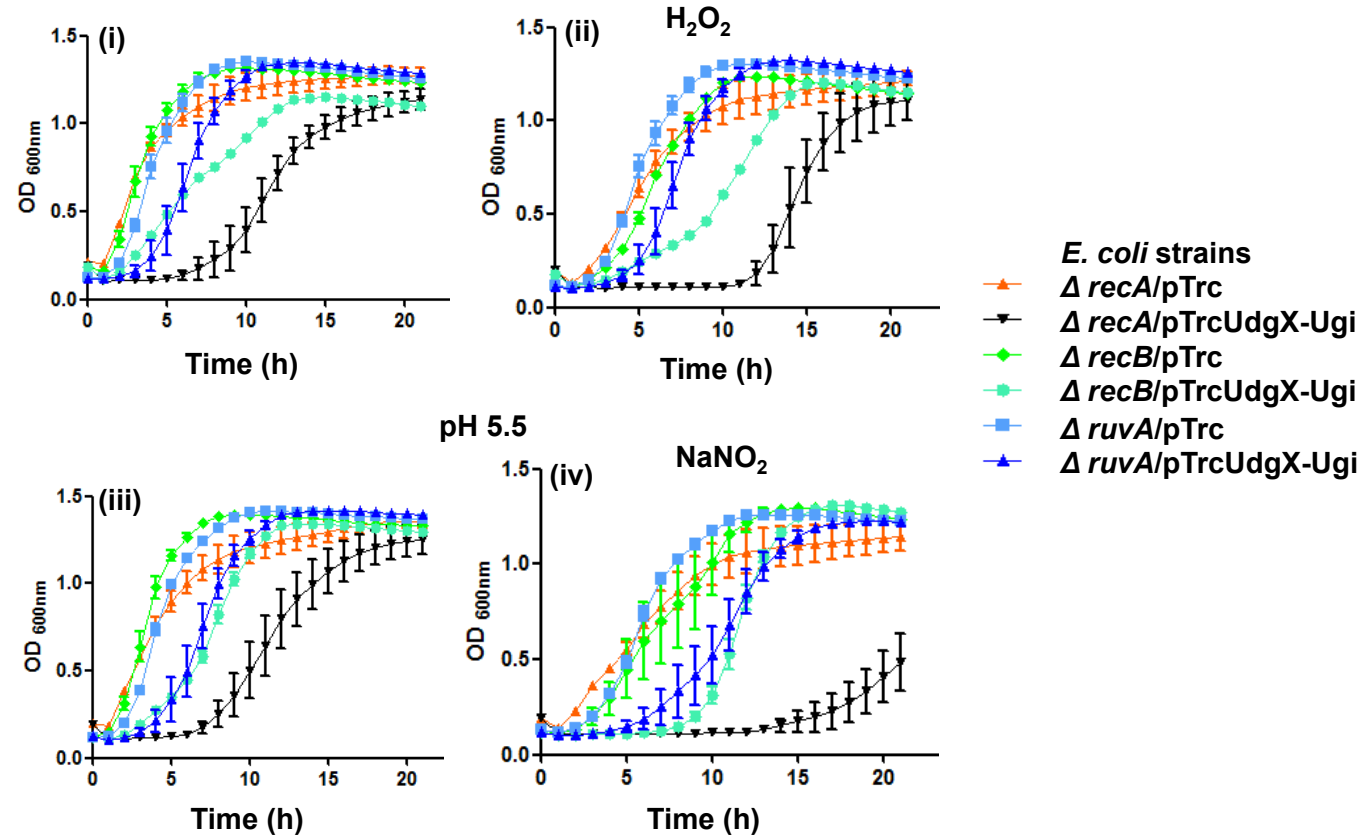

**Figure S9.** Growth curve of *E. coli* and its  $\Delta recA$ ,  $\Delta recB$  and  $\Delta ruvB$  derivatives harbouring different plasmid in the absence or presence of H<sub>2</sub>O<sub>2</sub> or NaNO<sub>2</sub>. *E. coli* strains (3 to 5 replicates) were used for growth curve analysis in 100 well microtiter plates. Aliquots (200  $\mu$ L) of 10<sup>-2</sup> dilutions of saturated cultures in LB containing Amp and 0.5 mM IPTG were taken in the absence or presence of 2.5 mM H<sub>2</sub>O<sub>2</sub> or 2.5 mM NaNO<sub>2</sub>. For growth in NaNO<sub>2</sub>, the medium was adjusted to a pH of 5.5. Growth was monitored as OD<sub>600</sub> at 37 °C for 24 h using Bioscreen C kinetic growth reader under constant shaking. Growth curves were prepared from the growth of three independent colonies for each strain, and the mean  $\pm$  SD were plotted.

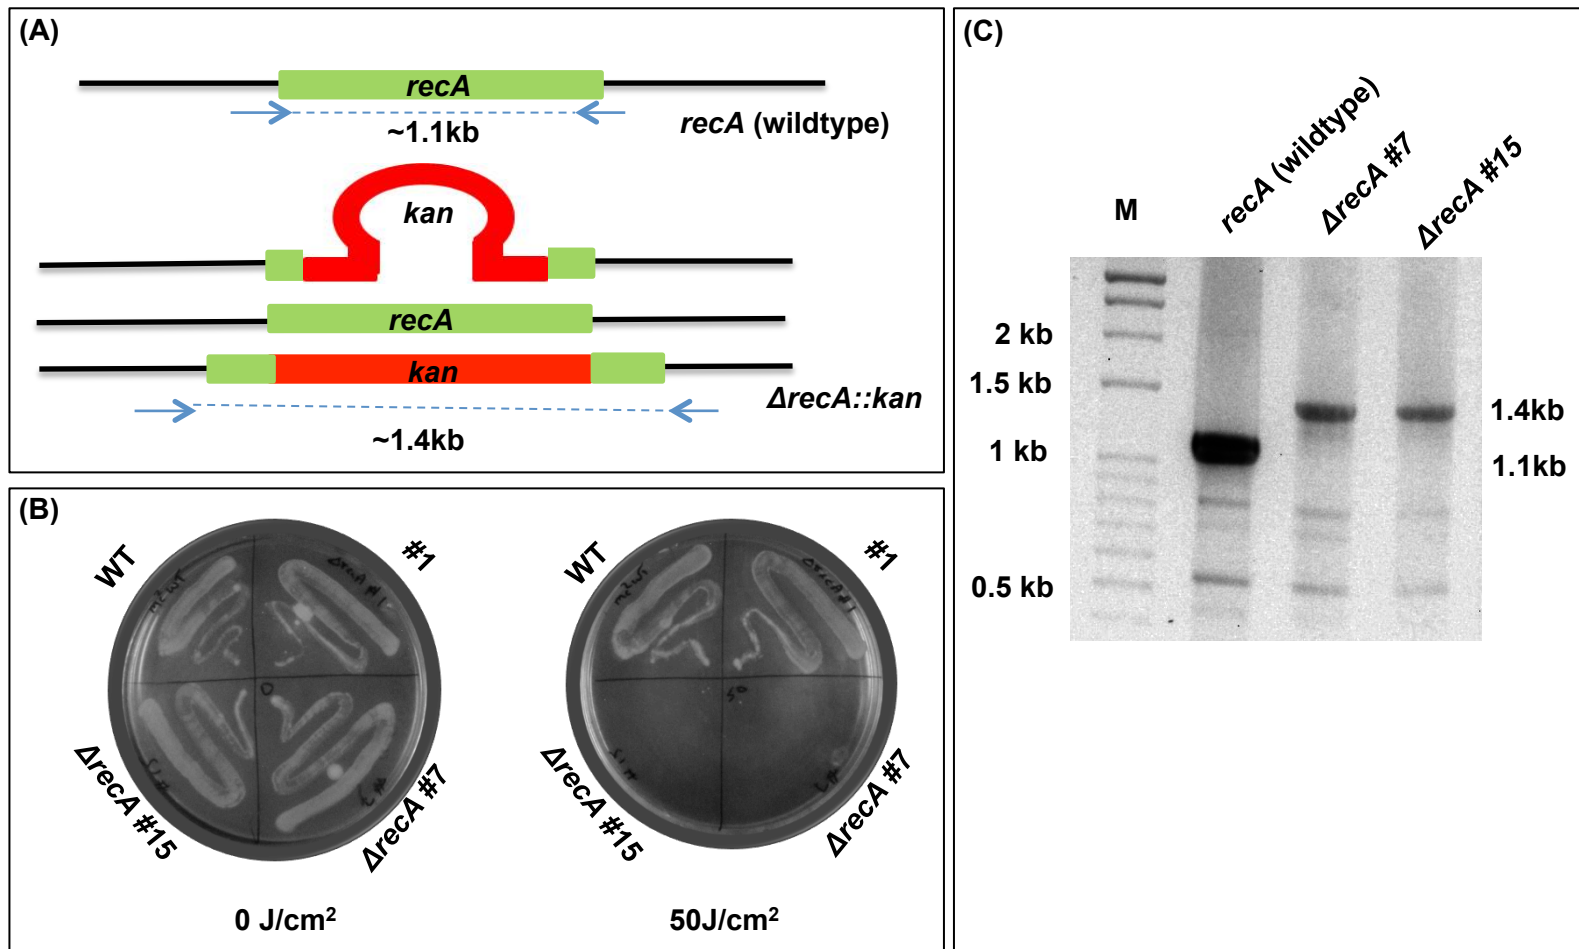

**Figure S10. Generation of *M. smegmatis* *recA* knockout and its confirmation.** Details of the  $\Delta recA::kan$  strain generation are described in the supplementary text. Description of the various panels is as follows. **(A)** Schematics of *recA* gene and the  $\Delta recA::kan$  loci showing the primer binding sites used for knockout confirmation and the expected amplicon sizes. **(B)** UV sensitivity assay for analysis of the putative *M. smegmatis*  $\Delta recA$  strain. Isolates 7 and 15 show UV sensitivity suggesting them to be the putative  $\Delta recA::kan$  strains. **(C)** PCR amplification of *recA* (WT) and  $\Delta recA::kan$  strains (#7 and #15) showing the wild type (1.1 kb) and the knockout (1.4 kb) amplicons, respectively.

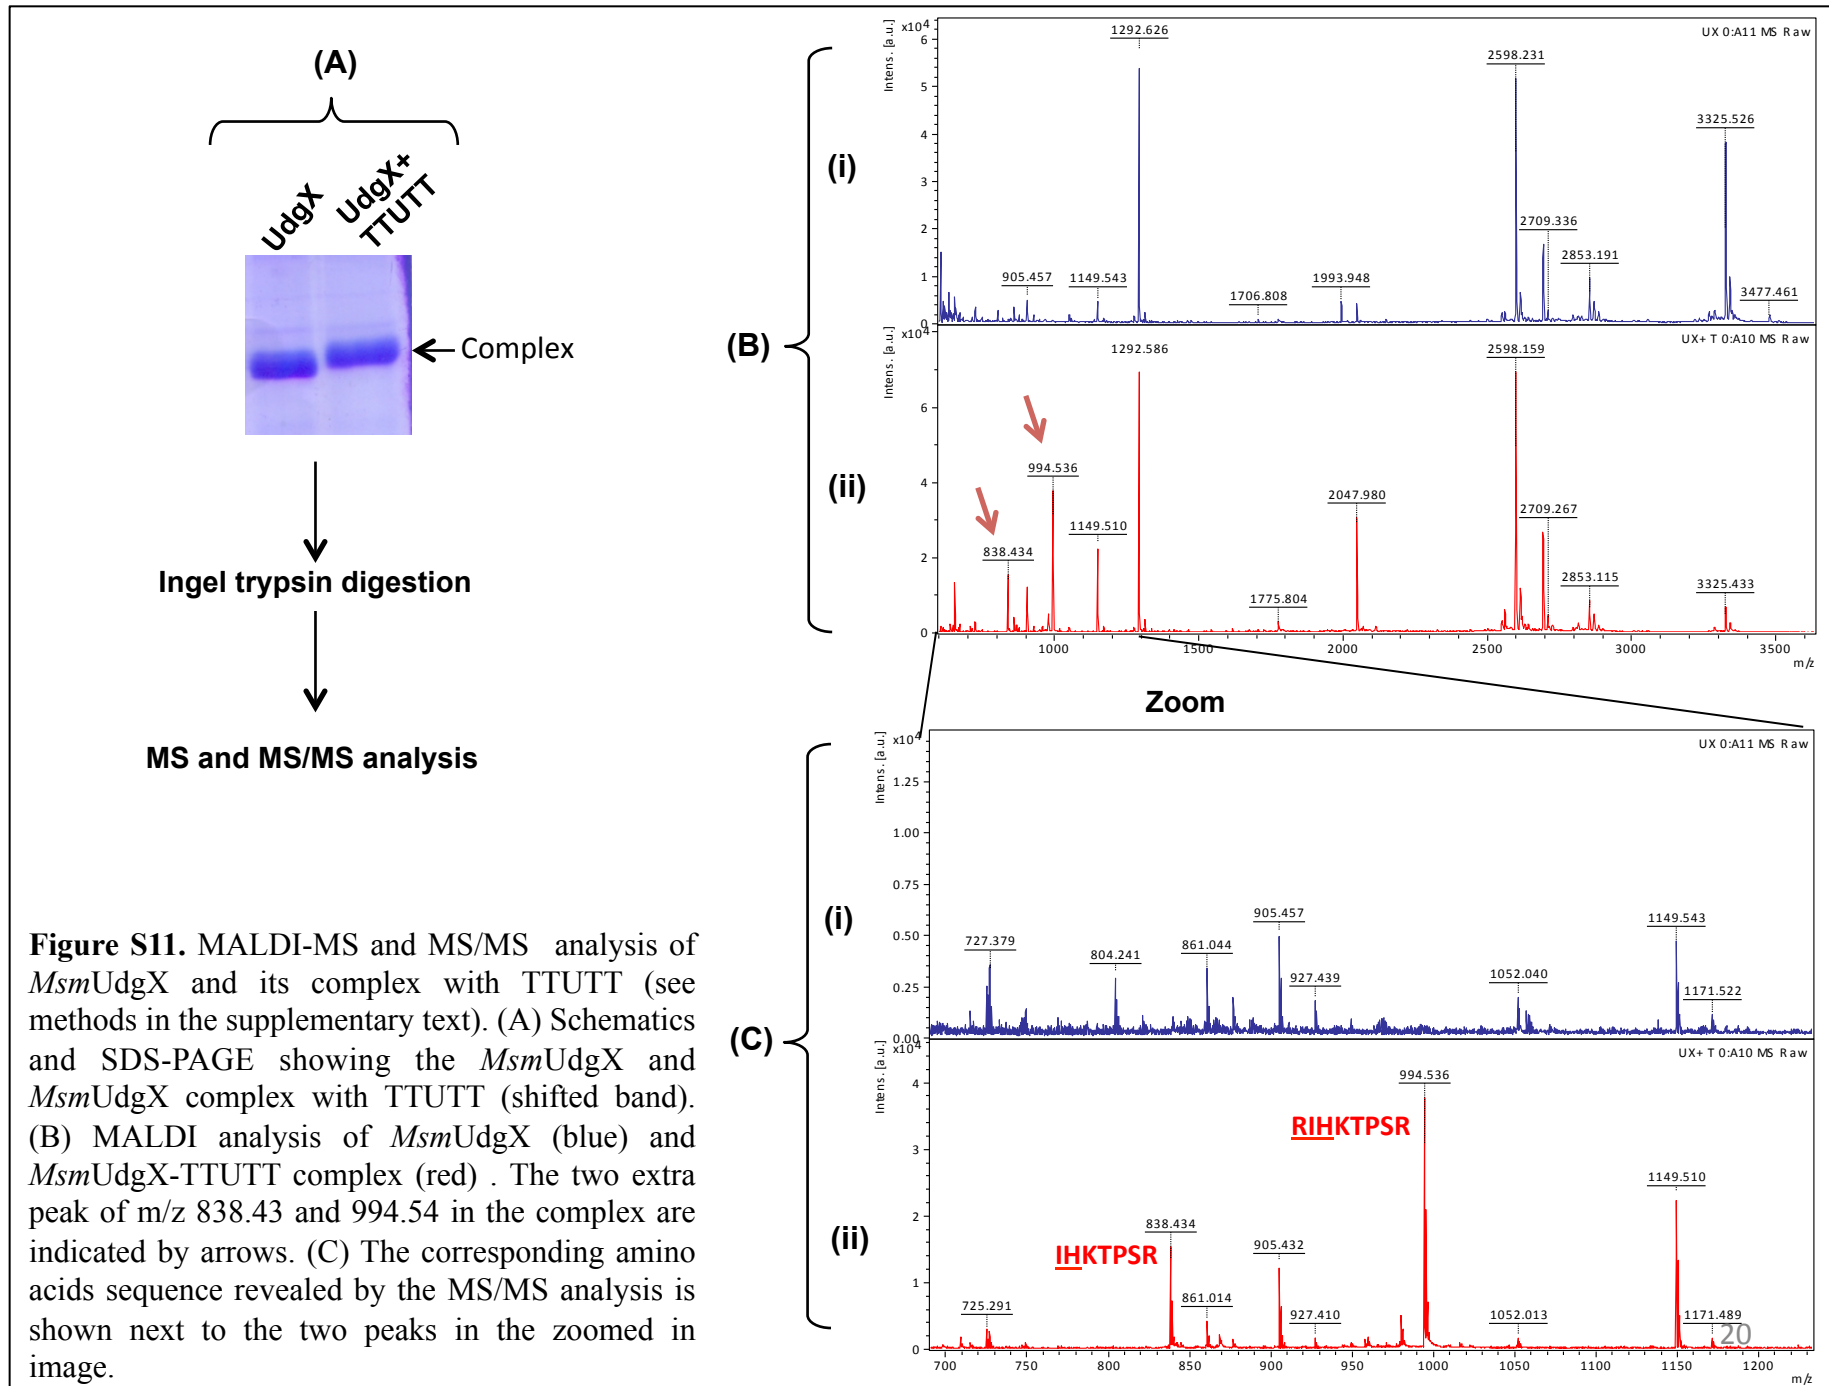

Sang et. al. Fig. S12

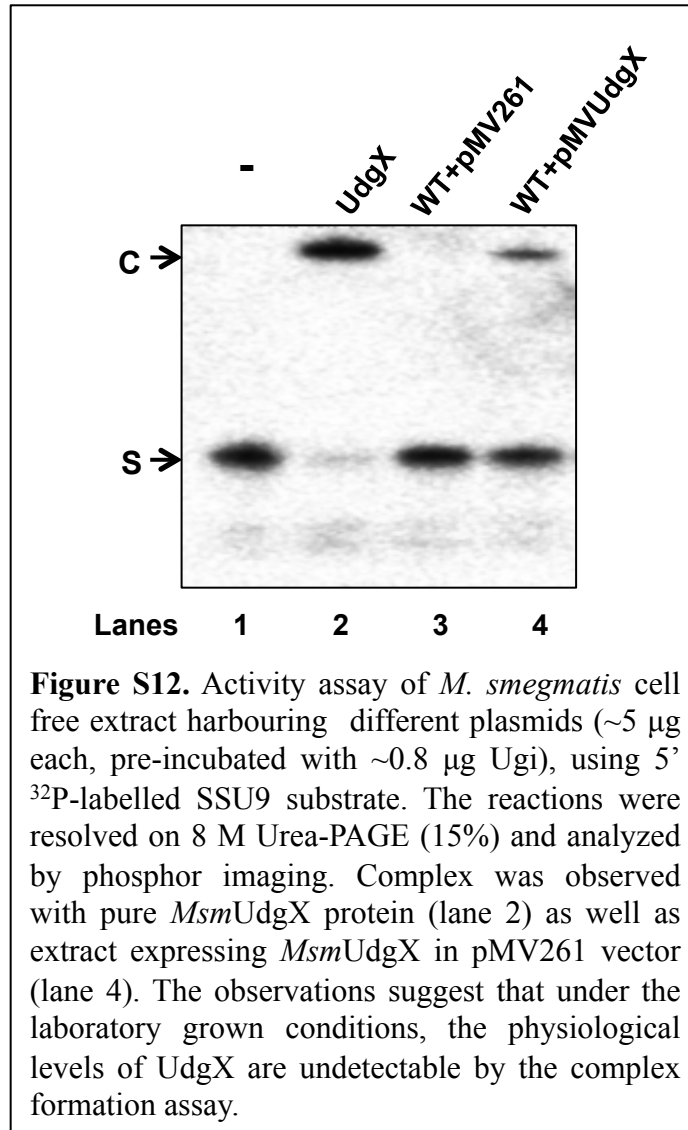

Sang et. al. Fig. S13

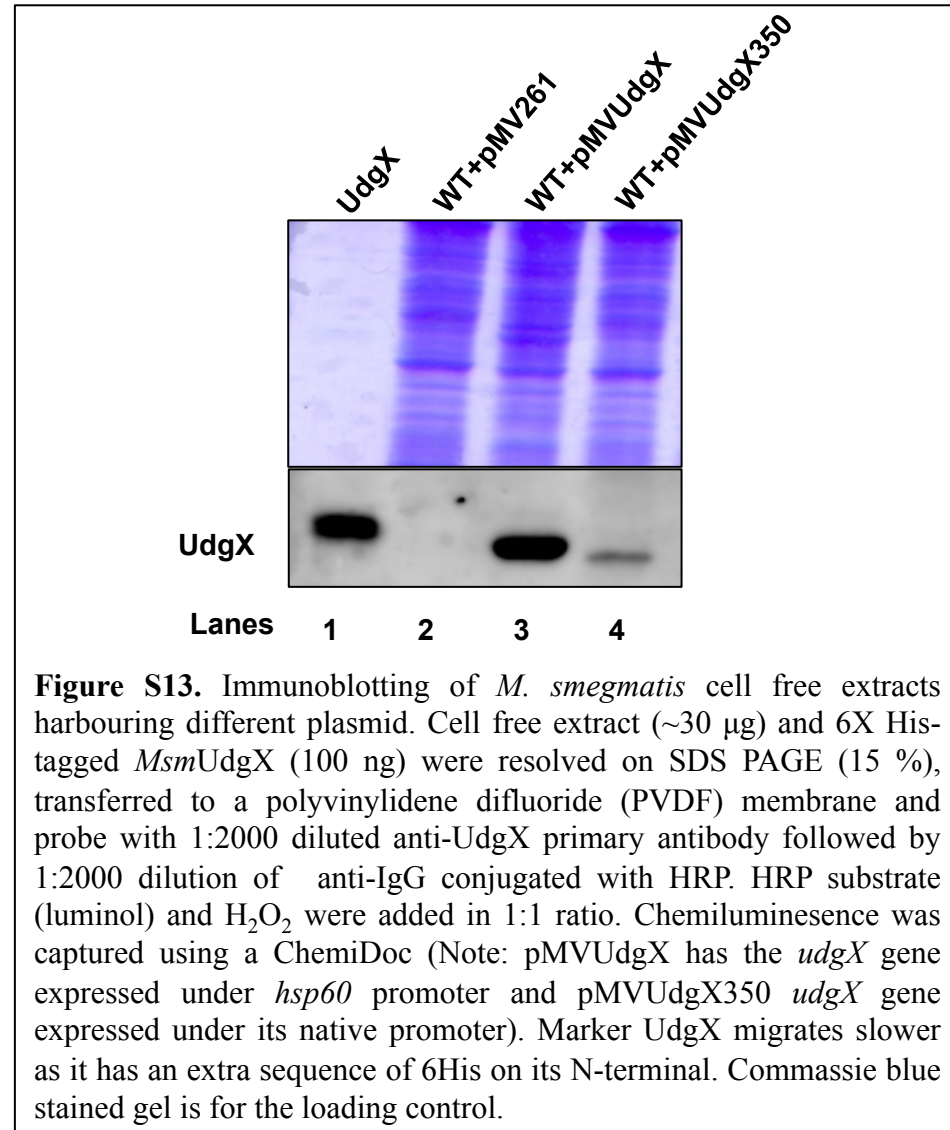

Sang et. al. Fig. S14

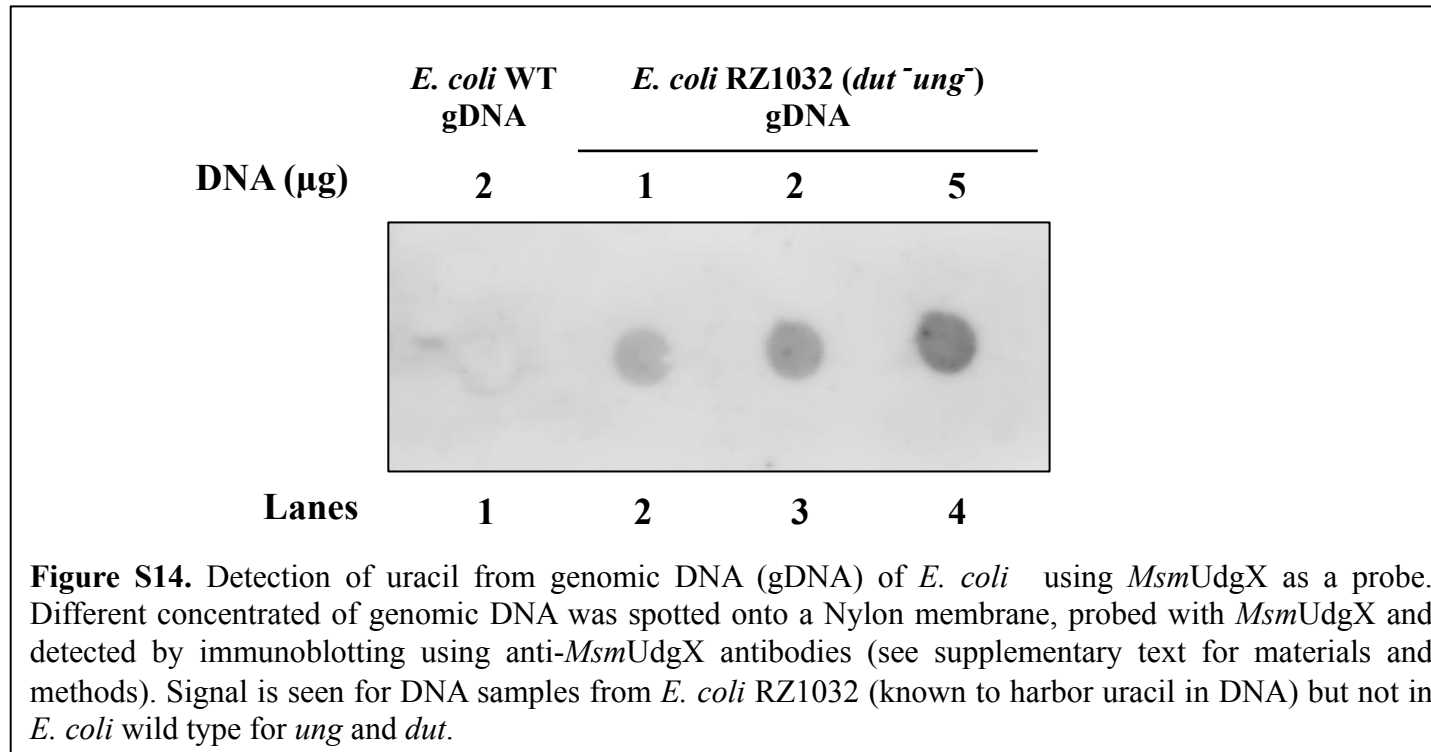

Supplement: supp_gkv854_nar-01818-m-2015-File009.pdf [file supp_gkv854_nar-01818-m-2015-File009.pdf]
